# Supplementary material for: Ultraporous nanofeatured PCL–PEO microfibrous scaffolds enhance cell infiltration, colonization and myofibroblastic differentiation
Source: Royal Society of Chemistry journal article supplement (doi:10.1039/c5nr04244e), 2015-01-01
Supplement: c5nr04244e1.pdf [file c5nr04244e1.pdf]

## Supporting Information

### Ultraporous Nanofeatured PCL-PEO Microfibrous Scaffolds Enhance Cell Infiltration, Colonization and Myofibroblastic Differentiation

Yan-Fang Li,<sup>a,c</sup> Hans Gregersen,<sup>b</sup> Jens Vinge Nygaard,<sup>b</sup> Weilu Cheng,<sup>a,d</sup> Ying Yu,<sup>c</sup> Yudong Huang,<sup>d</sup> Mingdong Dong,<sup>a</sup> Flemming Besenbacher<sup>a</sup> and Menglin Chen<sup>a\*</sup>

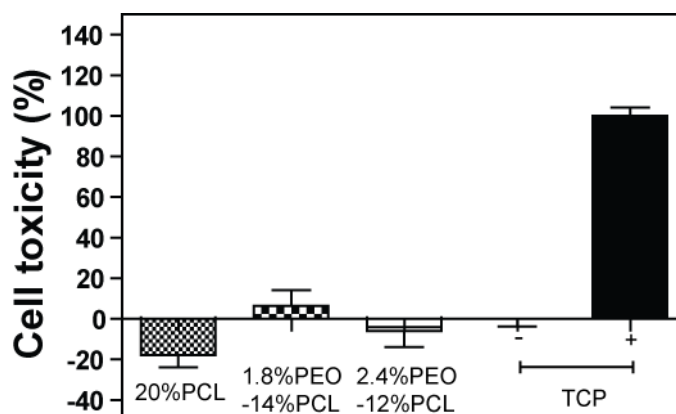

**Figure S1.** LDH activity measured from culture media collected 24 hours after seeding NiH3T3 cells onto PCL, 1.8%PEO-14%PCL and 2.4%PEO-12%PCL. High control (100 %) was cell culture media from cells seeded on tissue culture plastic (TCP) and incubated with 1 % Triton X-100. Low control (0 %) was cell culture media from cells seeded on tissue culture plastic (TCP).
